# Supplementary material for: PRM-MS&nbsp;Quantitative Analysis of Isomeric N-Glycopeptides Derived From Human Serum Haptoglobin of Patients With Cirrhosis and Hepatocellular Carcinoma
Source: Research Square preprint supplement (doi:10.21203/rs.3.rs-399869/v1), 2021-04-13
Supplement: Supplementary file 1 [file 81ecc74b62a3d57611bcb440.docx]

Supplementary data

**PRM-MS quantitative analysis of isomeric *N-*glycopeptides derived from human serum haptoglobin of patients with cirrhosis and hepatocellular carcinoma**

Cristian D. Gutierrez Reyes1⸸, Yifan Huang1⸸, Mojgan Atashi 1, Jie Zhang2, Jianhui Zhu2, Suyu Liu3, Neehar D. Parikh4, Amit G. Singal5, J. Dai3, David M. Lubman2 and Yehia Mechref1*

1. Department of Chemistry and Biochemistry, Texas Tech University, Lubbock, TX

2. Department of Surgery, The University of Michigan, Ann Arbor, MI 48109

3. Department of Biostatistics, University of Texas MD Anderson Cancer Center, Houston, TX 77030

4. Division of Gastroenterology and Hepatology, The University of Michigan, Ann Arbor, MI 48109

5. Division of Digestive and Liver Diseases, University of Texas Southwestern Medical Center, Dallas, TX 75390

⸸ These authors contribute equally to this work

*Corresponding author

Department of Chemistry and Biochemistry

Texas Tech University

Lubbock, TX 79409-1061

Email: yehia.mechref@ttu.edu

Tel: 806-742-3059

Fax: 806-742-1289

**Table of Contents:**

**Supplementary Figures:**

**Supplementary Figure S1.** Representative mass spectra of the three glycosylation sites. **a**) MVSHHN184LTTGATLINE, **b**) NLFLN207HSE, and **c**) VVLHPN241YSQVDIGLIK. * Common fragment ion with different charge.

**Supplementary Figure S2.** Interpretation of fucosylated glycopeptides; **a**) *N-*glycopeptide NLF_4512 isomers 1 and 2, **b**) *N-*glycopeptide NLF_6711.

**Supplementary Figure S3.** Sialic acid linkage of important and abundant haptoglobin *N-*glycopeptides.

**Supplementary Figure S4.** EICs showing the achieved isomeric separation of important haptoglobin *N-*glycopeptides.

**Supplementary Figure S5.** PCA plot of *N-*glycopeptides derived from human serum haptoglobin from patients with cirrhosis and HCC. Scores for PCA 1 (20.7%) versus PCA 2 (15.7%), autoscale. Plot generated from all data, including the three haptoglobin glycosylation sites observed; MVSHHN184LTTGATLINE, NLFLN207HSE, and VVLHPN241YSQVDIGLIK.

**Supplementary Figure S6.** Heat maps of the glycopeptide structures for each glycosylation site derived from human serum haptoglobin patients with cirrhosis and HCC. **a)** MVSHHN184LTTGATLINE = MVS, **b)** NLFLN207HSE = NLF, and **c)** VVLHPN241YSQVDIGLIK = VVL. Glycan nomenclature: HexNAc, Hex, Fuc, NeuAc (*N-*acetylhexosamine, Hexose, Fucose, *N-*acetylneuraminic acid). The arrows indicate the statistically significant glycopeptide structures between two cohorts.

**Supplementary Figure S7.** Changes in abundance of haptoglobin sialylated, fucosylated sialylated, and other glycans from cirrhosis and HCC samples. **a)** Considering all data, and the haptoglobin glycosylation sites, **b)** MVSHHN184LTTGATLINE, **c)** NLFLN207HSE, and **d)** VVLHPN241YSQVDIGLIK.

**Supplementary Figure S8.** Receiver operating characteristic (ROC) curve for the glycopeptide structures with statistically significance between cirrhosis and HCC patients. MVSHHN184LTTGATLINE = MVS, NLFLN207HSE = NLF, VVLHPN241YSQVDIGLIK = VVL, and Isomer = Iso. Glycan nomenclature: HexNAc, Hex, Fuc, NeuAc (*N-*acetylhexosamine, Hexose, Fucose, *N-*acetylneuraminic acid).

**Supplementary Tables:**

**Supplementary Table S1.** PRM information for each of the target haptoglobin *N-*glycopeptides.

**Supplementary Table S2.** Normalized abundance of all identified haptoglobin *N-*glycopeptides from patients with cirrhosis.

**Supplementary Table S3.** Normalized abundance of all identified haptoglobin *N-*glycopeptides from hepatocellular carcinoma (HCC) patients.

**Supplementary Table S4.** Descriptive statistics of biomarker candidates. MVSHHN184LTTGATLINE = MVS, NLFLN207HSE = NLF, VVLHPN241YSQVDIGLIK = VVL, Iso = isomer, and AFP = alpha-fetoprotein. Glycan nomenclature: HexNAc, Hex, Fuc, NeuAc (*N-*acetylhexosamine, Hexose, Fucose, *N-*acetylneuraminic acid).

**Supplementary Table S5.** Pairwise Pearson’s correlation coefficient for the combination of two *N-*glycopeptides. MVSHHN184LTTGATLINE = MVS, NLFLN207HSE = NLF, VVLHPN241YSQVDIGLIK = VVL, Iso = isomer, and AFP = alpha-fetoprotein. Glycan nomenclature: HexNAc, Hex, Fuc, NeuAc (N-acetylhexosamine, Hexose, Fucose, *N-*acetylneuraminic acid).

**Supplementary Figure S1**

**Supplementary Figure S1.** Representative mass spectra of the three glycosylation sites. **a**) MVSHHN184LTTGATLINE, **b**) NLFLN207HSE, and **c**) VVLHPN241YSQVDIGLIK. * Common fragment ion with different charge.

**Supplementary Figure S2**

**Supplementary Figure S2.** Interpretation of fucosylated glycopeptides; **a**) *N-*glycopeptide NLF_4512 isomers 1 and 2, **b**) *N-*glycopeptide NLF_6711.

The core or branch fucosylation of most abundant *N-*glycopeptides was performed by the evaluation of their fragmentation. The high abundance of core fragments allowed us to identified this type of structures, **Supplementary Figure S1a** shows the NLF_4512 **core** fucosylated glycopeptide where the core-fucose fragments were observed in both isomers. Otherwise, the low abundance of branched fragments made difficult the identification of this type of glycopeptides, **Supplementary Figure S1b** shows the NLF_6711 **branch** fucosylated glycopeptide, a branch-fucose fragment with a *m/z* of 2743.1296 was observed in the EIC, additionally the absence of core-fucose fragments gave us a clear conclusion of the branch fucosylation.

**Supplementary Figure S3**

**Supplementary Figure S3.** Sialic acid linkage of important and abundant haptoglobin *N-*glycopeptides.

A pooled sample was used to determine the sialic acid linkage of some abundant *N-*glycopeptides by the application of α2,3 neuraminidase enzyme digestion. The sample was fractionated using the LC method mentioned in section *2.4*, the fractions were collected considering the retention time ranges +/- 2 min aforementioned for the elution of mono-, di, and tri-sialylated glycopeptides (**Supplementary Table S1**). The fractionation of the sample was performed to avoid peak overlapping of the digested sialylated glycopeptide structures and the present sialylated glycopeptides in the sample, the fractions were divided in two, control and digested samples. The samples were analyzed in an scan range of 300 – 2000 *m/z*. We were able to identified the linkage of some high abundant sialylated glycopeptides. **a**) For the *N-*glycopeptide NLF_5601 both isomeric structures have sialic acid linkage α2,6, no changes were observed after enzymatic digestion. **b**) For the *N-*glycopeptide NLF_5602; the shift in mass of isomer 2 indicated an α2,3 linkages, and therefore no changes in the isomer 1 indicated α2,6 linkages. **c**) For the *N-*glycopeptide NLF_5603; isomer 1 have α2,6 linkages, the mass shift of isomer 3 after enzymatic digestion indicated a structure with α2,3 linkages. Meanwhile for isomer 2 the incomplete digestion indicated by a remaining peak suggest the presence of sialic acid molecules with both linkages, the change in peak area was about 1/3 of the initial which suggest a ratio 1 to 3 of linkages α2,6 and α2,3. Huang et al. reported these three isomeric structures in their glycomic analysis of serum haptoglobin 1. **d**) For the *N-*glycopeptide NLF_5612 both isomeric structures have sialic acid linkage α2,6, no changes were observed after enzymatic digestion. **e**) For the *N-*glycopeptide NLF_5613; the shift in mass of isomer 2 indicated an α2,3 linkages, and therefore no changes in the isomer 1 indicated α2,6 linkages.

**Supplementary Figure S4**

**Supplementary Figure S4.** EICs showing the achieved isomeric separation of important haptoglobin *N-*glycopeptides.

**Supplementary Figure S5**

**Supplementary Figure S5.** PCA plot of *N-*glycopeptides derived from human serum haptoglobin from patients with cirrhosis and HCC. Scores for PCA 1 (20.7%) versus PCA 2 (15.7%), autoscale. Plot generated from all data, including the three haptoglobin glycosylation sites observed; MVSHHN184LTTGATLINE, NLFLN207HSE, and VVLHPN241YSQVDIGLIK.

**Supplementary Figure S6**

**Supplementary Figure S6.** Heat maps of the glycopeptide structures for each glycosylation site derived from human serum haptoglobin patients with cirrhosis and HCC. **a)** MVSHHN184LTTGATLINE = MVS, **b)** NLFLN207HSE = NLF, and **c)** VVLHPN241YSQVDIGLIK = VVL. Glycan nomenclature: HexNAc, Hex, Fuc, NeuAc (*N-*acetylhexosamine, Hexose, Fucose, *N-*acetylneuraminic acid). The arrows indicate the statistically significant glycopeptide structures between two cohorts.

**Supplementary Figure S7**

**Supplementary Figure S7.** Changes in abundance of haptoglobin sialylated, fucosylated sialylated, and other glycans from cirrhosis and HCC samples. **a)** Considering all data, and the haptoglobin glycosylation sites, **b)** MVSHHN184LTTGATLINE, **c)** NLFLN207HSE, and **d)** VVLHPN241YSQVDIGLIK.

**Supplementary Figure S8**

**Supplementary Figure S8.** Receiver operating characteristic (ROC) curve for the glycopeptide structures with statistically significance between cirrhosis and HCC patients. MVSHHN184LTTGATLINE = MVS, NLFLN207HSE = NLF, VVLHPN241YSQVDIGLIK = VVL, and Isomer = Iso. Glycan nomenclature: HexNAc, Hex, Fuc, NeuAc (*N-*acetylhexosamine, Hexose, Fucose, *N-*acetylneuraminic acid).

**Supplementary Table S1.** PRM information for each of the target haptoglobin *N-*glycopeptides.

| **Glycopeptide *a, b*** | **Charge** | **rt (min)** | **Precursor ion (*m/z*)** | **Fragment ions (*m/z*)** |
| --- | --- | --- | --- | --- |
| MVS_4500 | + 3 | 42.24 | 1120.8183 | 1940.9333, 1072.5091, 1153.5359, 1234.5626, 1315.5888, 1417.1236 |
| MVS_4511 | + 3 | 48.01 | 1266.5361 | 1940.9345, 1072.5099, 1153.5363, 1234.5613, 1315.5918, 1417.1268 |
| MVS_4512 | + 3 | 57.07 | 1363.5679 | 1940.9336, 2086.9927, 2306.0684, 2468.1247, 2614.1797, 2630.1775 |
| MVS_4501 | + 3 | 48.16 | 1217.8501 | 1940.9348, 1072.5088, 1153.5328, 1234.5603, 1315.5876, 1417.1272 |
| MVS_4502 | + 3 | 54.73 | 1314.8819 | 1940.9337, 1072.5088, 1153.5358, 1234.5612, 1315.5887, 1498.1566 |
| MVS_4601 | + 3 | 47.70 | 1271.8677 | 1940.9342, 2468.1247, 2630.1767, 2792.2461, 1336.5882, 1417.1265 |
| MVS_5611 | + 3 | 47.18 | 1388.2468 | 1940.9331, 1072.5094, 1153.5355, 1234.5614, 1336.1014, 1417.1266 |
| MVS_5612 | + 4 | 56.36 | 1114.2108 | 1940.9355, 2086.9979, 2306.0781, 2468.1318, 2630.1824, 2995.3198 |
| MVS_5613 | + 3 | 57.30 | 1582.3104 | 1940.9361, 1459.6648, 1585.6160, 2101.8861, 2468.1117, 2995.3202 |
| MVS_5601 | + 3 | 47.48 | 1339.5609 | 1940.9336, 1072.5086, 1153.5362, 1234.5614, 1315.5884, 1498.1562 |
| MVS_5602 | + 3 | 54.08 | 1436.5927 | 1940.9337, 1072.5088, 1153.5349, 1234.5614, 1315.5827, 1417.1324 |
| NLF_3401 | + 3 | 49.81 | 1533.6345 | 1940.9310, 1153.5323, 1234.5514, 1417.1323, 1498.1586, 1599.6897 |
| NLF_4401 | + 2 | 49.44 | 1261.513 | 1176.5484, 1056.5070, 1379.6285, 1541.6803, 1703.7228, 1865.7870 |
| NLF_4500 | + 2 | 40.39 | 1363.0527 | 1176.5498, 1379.6307, 1541.6826, 1703.7349, 1865.7875, 1906.8068 |
| NLF_4511 | + 2 | 45.27 | 1298.5314 | 1176.5490, 1379.6296, 1703.7336, 1865.7869, 2068.8884, 2230.9209 |
| NLF_4512 | + 3 | 57.98 | 1011.7411 | 1176.5490, 1379.6298, 1541.6806, 1703.7309, 1865.7865, 2011.8485 |
| NLF_4501 | + 3 | 46.13 | 1108.7729 | 1176.5505, 1703.7195, 1865.7773, 2068.8518, 2011.8485, 2230.9328 |
| NLF_4502 | + 2 | 57.49 | 1444.0791 | 1176.5489, 1379.6279, 1541.6831, 1703.7328, 1865.7862, 2068.8710 |
| NLF_5611 | + 3 | 47.31 | 1060.0869 | 1176.5495, 1541.6829, 1703.7334, 1865.7890, 2068.8653, 2230.9326 |
| NLF_5612 | + 3 | 56.34 | 1133.4518 | 1176.5492, 1379.6293, 1541.6816, 1703.7332, 1865.7881, 2068.8665 |
| NLF_5613 | + 3 | 70.56 | 1230.4836 | 1176.5496, 1379.6278, 1541.6826, 1703.7333, 1865.7822, 2068.8705 |
| NLF_5601 | + 3 | 45.18 | 1327.5154 | 1176.5496, 1379.6244, 1541.6758, 1703.7313, 2068.8542, 2230.9204 |
| NLF_5602 | + 3 | 56.25 | 1084.7659 | 1176.5497, 1379.6282, 1541.6810, 1703.7330, 1865.7879, 2230.9212 |
| NLF_5603 | + 3 | 71.39 | 1181.7977 | 1176.5498, 1379.6283, 1541.6814, 1703.7339, 1865.7873, 2230.9204 |
| NLF_6711 | + 3 | 46.06 | 1278.8295 | 1176.5502, 1379.6268, 1541.6714, 1703.7332, 2068.8577, 2230.9304 |
| NLF_6712 | + 3 | 58.07 | 1255.1626 | 1176.5494, 1703.7345, 1932.9272, 2068.8702, 2230.9241, 1541.6814 |
| NLF_6713 | + 3 | 60.00 | 1352.1944 | 1176.5503, 1129.5302, 1210.5564, 2068.8720, 2230.9256, 2596.0621 |
| NLF_6701 | + 3 | 43.81 | 1449.2262 | 1176.5499, 1703.7356, 1875.9048, 1892.9331, 2068.8711, 2230.9238 |
| NLF_6702 | + 3 | 57.79 | 1206.4766 | 1176.5494, 1379.6287, 1541.6718, 1703.7314, 2068.8716, 2596.0640 |
| NLF_6704 | + 3 | 60.29 | 1303.5084 | 1176.5493, 1379.6289, 1703.7333, 2068.8687, 2230.9216, 2596.0574 |
| VVL_4401 | + 4 | 77.35 | 1123.4308 | 1176.5509, 1201.5585, 1642.6395, 1516.6875, 1220.5885, 2528.0915 |
| VVL_4500 | + 3 | 61.74 | 1182.8833 | 1998.0903, 2231.9111, 2069.8580, 1866.7745, 1177.5254, 1542.6679 |
| VVL_4512 | + 3 | 78.62 | 1139.8691 | 1998.0914, 1101.0855, 1182.1120, 1263.1389, 1344.1667, 1445.7048 |
| VVL_4501 | + 3 | 67.98 | 1382.6187 | 1998.0943, 2013.9092, 1290.7283, 1445.7031, 1486.7358, 1526.7318 |
| VVL_4502 | + 3 | 75.35 | 1236.9009 | 1998.0868, 1101.0865, 1182.1102, 1344.1648, 1445.7029, 1526.7317 |
| VVL_5612 | + 3 | 78.15 | 1333.9327 | 1999.0859, 1263.1281, 1344.1588, 1445.6924, 1526.7240, 1285.5670 |
| VVL_5601 | + 4 | 69.80 | 1128.4989 | 1998.0907, 1128.6021, 1347.7465, 1445.6995, 1526.7316, 1709.3043 |
| VVL_5602 | + 4 | 77.58 | 1019.2106 | 1998.0891, 1174.5344, 1417.6190, 1472.2158, 1580.6812, 1624.7572 |
| VVL_5603 | + 4 | 87.31 | 1091.9844 | 1998.0902, 1263.1382, 1709.2971, 1344.1647, 1182.1115, 1628.2694 |
| VVL_6701 | + 4 | 69.23 | 1164.7583 | 1998.0890, 1101.0842, 1263.1386, 1345.7034, 1526.7317, 1709.2975 |
| VVL_6702 | + 4 | 77.30 | 1110.4936 | 1998.0898, 1209.6461, 1445.7010, 1827.7471, 1451.6415, 1288.5770 |
| VVL_6703 | + 4 | 87.23 | 1183.2675 | 1998.0909, 1177.5336, 1445.7034, 1704.7222, 2231.9072, 2069.8579 |

***a* PEPTIDE_HexNAc, Hex, Fuc, NeuAc (*N-*acetylhexosamine, Hexose, Fucose, N-acetylneuraminic acid)**

***b* MVSHHN184LTTGATLINE = MVS, NLFLN207HSE = NLF, and VVLHPN241YSQVDIGLIK=VVL**

**Supplementary Table S2.** Normalized abundance of all identified haptoglobin *N-*glycopeptides from patients with cirrhosis.

| **Structure *a, b ,c*** | **NASH58** | **NASH60** | **NASH61** | **NASH62** | **NASH63** |
| --- | --- | --- | --- | --- | --- |
| MVS_4500_Iso 1 | 0.001158 | 0.004558 | 0.038396 | 0.033966 | 0.056947 |
| MVS_4500_Iso 2 | 0.000000 | 0.000847 | 0.025694 | 0.008426 | 0.027195 |
| MVS_4511 | 0.172140 | 0.021860 | 0.159971 | 0.006838 | 0.019716 |
| MVS_4512 | 0.029079 | 0.440765 | 0.117446 | 0.050089 | 0.158772 |
| MVS_4501 | 1.989487 | 0.845344 | 2.542171 | 3.386456 | 5.608889 |
| MVS_4502 | 11.605478 | 21.711841 | 6.950291 | 7.618635 | 14.275278 |
| MVS_4601 | 0.002052 | 0.016284 | 0.025543 | 0.007816 | 0.016843 |
| MVS_5611 | 0.012339 | 0.004409 | 0.027807 | 0.016664 | 0.003284 |
| MVS_5612 | 0.736124 | 0.039540 | 0.049433 | 0.002346 | 0.005532 |
| MVS_5613 | 0.124819 | 0.331436 | 0.078711 | 0.041897 | 0.035189 |
| MVS_5601 | 0.013623 | 0.032364 | 0.133995 | 0.071166 | 0.078156 |
| MVS_5602_Iso 1 | 0.117780 | 0.172603 | 0.173967 | 0.184630 | 0.151659 |
| MVS_5602_Iso 2 | 0.012437 | 0.095092 | 0.103989 | 0.136854 | 0.133255 |
| NLF_3401_Iso 1 | 0.002502 | 0.006990 | 0.026206 | 0.015629 | 0.005027 |
| NLF_3401_Iso 2 | 0.077311 | 0.069178 | 0.253857 | 0.211852 | 0.056835 |
| NLF_4401_Iso1 | 0.006501 | 0.021809 | 0.015017 | 0.052675 | 0.006340 |
| NLF_4401_ Iso 2 | 0.011045 | 0.027694 | 0.047140 | 0.037411 | 0.010924 |
| NLF_4401_ Iso 3 | 0.002375 | 0.014940 | 0.031534 | 0.012723 | 0.003148 |
| NLF_4500_ Iso 1 | 0.029079 | 0.157114 | 0.648749 | 0.581882 | 0.234456 |
| NLF_4500_ Iso 2 | 0.016171 | 0.048863 | 0.160281 | 0.187265 | 0.071198 |
| NLF_4511_ Iso 1 | 4.037482 | 0.529575 | 1.400824 | 0.123315 | 0.186486 |
| NLF_4511_ Iso 2 | 0.667479 | 0.266131 | 0.276462 | 0.066886 | 0.174560 |
| NLF_4512_ Iso 1 | 0.104471 | 0.240249 | 0.136462 | 0.102808 | 0.124574 |
| NLF_4512_ Iso 2 | 0.687277 | 1.127274 | 0.487529 | 0.105405 | 0.384380 |
| NLF_4501 | 3.604328 | 7.132865 | 17.912419 | 17.770312 | 7.461332 |
| NLF_4502_ Iso 1 | 17.832261 | 24.289064 | 28.726992 | 20.000593 | 13.089949 |
| NLF_4502_ Iso 2 | 1.456698 | 5.261253 | 3.168093 | 3.914917 | 3.699012 |
| NLF_5611_ Iso 1 | 0.696535 | 0.288153 | 1.659162 | 0.139084 | 0.099211 |
| NLF_5611_ Iso 2 | 0.053215 | 0.079770 | 0.184608 | 0.020196 | 0.021184 |
| NLF_5612_ Iso 1 | 1.377862 | 0.562210 | 1.098013 | 0.079552 | 0.104525 |
| NLF_5612_ Iso 2 | 2.243050 | 2.641493 | 2.494165 | 0.724766 | 1.124641 |
| NLF_5613_ Iso 1 | 2.127356 | 4.516989 | 3.421001 | 0.996397 | 1.847444 |
| NLF_5613_ Iso 2 | 0.170596 | 0.613562 | 0.394640 | 0.114283 | 0.276375 |
| NLF_5601_ Iso 1 | 0.318941 | 0.932014 | 1.786508 | 0.689545 | 0.440892 |
| NLF_5601_ Iso 2 | 0.445792 | 0.562242 | 4.586911 | 2.591739 | 0.625384 |
| NLF_5602_ Iso 1 | 0.834054 | 2.340640 | 3.167876 | 3.774741 | 1.408425 |
| NLF_5602_ Iso 2 | 1.579275 | 2.853439 | 4.903225 | 7.601251 | 3.424559 |
| NLF_5603_ Iso 1 | 0.572339 | 1.933035 | 1.936758 | 1.937605 | 0.909078 |
| NLF_5603_ Iso 2 | 0.383959 | 3.001501 | 3.925806 | 7.042273 | 3.802529 |
| NLF_5603_ Iso 3 | 0.099856 | 0.428597 | 0.540127 | 1.252366 | 0.840548 |
| NLF_6711_ Iso 1 | 0.023684 | 0.028051 | 0.520696 | 0.919990 | 0.688571 |
| NLF_6711_ Iso 2 | 0.033524 | 0.130041 | 0.093552 | 0.257761 | 0.226104 |
| NLF_6711_ Iso 3 | 0.033990 | 0.039410 | 0.020459 | 0.025181 | 0.003509 |
| NLF_6711_ Iso 4 | 0.122684 | 0.026921 | 0.017673 | 0.024229 | 0.006514 |
| NLF_6712_ Iso 1 | 0.113621 | 0.236503 | 0.328861 | 0.032889 | 0.065114 |
| NLF_6712_ Iso 2 | 0.020665 | 0.041176 | 0.075073 | 0.039297 | 0.015719 |
| NLF_6712_ Iso 3 | 0.016055 | 0.054174 | 0.022653 | 0.067162 | 0.012667 |
| NLF_6713_ Iso 1 | 0.002077 | 0.004852 | 0.048358 | 0.077945 | 0.013023 |
| NLF_6713_ Iso 2 | 0.014728 | 0.008005 | 0.016667 | 1.364194 | 0.003381 |
| NLF_6713_ Iso 3 | 0.001347 | 0.017608 | 0.039514 | 0.077323 | 0.008920 |
| NLF_6713_ Iso 4 | 0.001175 | 0.013659 | 0.012698 | 0.055232 | 0.002315 |
| NLF_6713_ Iso 5 | 0.012377 | 0.067956 | 0.063186 | 0.196454 | 0.026837 |
| NLF_6701 | 0.166229 | 0.614146 | 1.810238 | 1.358377 | 0.324117 |
| NLF_6702_ Iso 1 | 0.028366 | 0.164502 | 0.304226 | 0.185842 | 0.064725 |
| NLF_6702_ Iso 2 | 0.031519 | 0.344619 | 0.528783 | 0.499013 | 0.225598 |
| NLF_6702_ Iso 3 | 0.055464 | 0.144253 | 0.167834 | 0.140289 | 0.072240 |
| NLF_6704 | 0.031911 | 0.005573 | 0.038367 | 0.075102 | 0.008639 |
| VVL_4401 | 0.017488 | 0.029187 | 0.065600 | 0.043096 | 0.024637 |
| VVL_4500 | 0.000000 | 0.001089 | 0.000241 | 0.003016 | 0.010552 |
| VVL_4512_ Iso 1 | 0.050273 | 0.001216 | 0.038315 | 0.047753 | 0.050409 |
| VVL_4512_ Iso 2 | 0.291602 | 0.150731 | 0.052100 | 0.156659 | 0.151171 |
| VVL_4501 | 2.236705 | 0.699156 | 0.094924 | 0.643229 | 2.191318 |
| VVL_4502 | 41.060014 | 12.173995 | 1.203537 | 10.119215 | 32.210601 |
| VVL_5612 | 0.561130 | 0.265834 | 0.207746 | 0.629018 | 0.304115 |
| VVL_5601 | 0.106041 | 0.130858 | 0.086878 | 0.201226 | 0.067199 |
| VVL_5602 | 0.167271 | 0.230970 | 0.047967 | 0.215423 | 0.518235 |
| VVL_5603_ Iso 1 | 0.120311 | 0.107812 | 0.015789 | 0.056067 | 0.157438 |
| VVL_5603_ Iso 2 | 0.141324 | 0.308257 | 0.021800 | 0.411510 | 1.076908 |
| VVL_5603_ Iso 3 | 0.020213 | 0.055686 | 0.008845 | 0.066404 | 0.256927 |
| VVL_6701 | 0.012416 | 0.012914 | 0.035260 | 0.056407 | 0.020208 |
| VVL_6702 | 0.012787 | 0.019147 | 0.054311 | 0.069431 | 0.031575 |
| VVL_6703_ Iso 1 | 0.114724 | 0.103545 | 0.121280 | 0.069112 | 0.079623 |
| VVL_6703_ Iso 2 | 0.123959 | 0.104564 | 0.018792 | 0.102899 | 0.077359 |

***a* PEPTIDE_HexNAc, Hex, Fuc, NeuAc (*N-*acetylhexosamine, Hexose, Fucose, N-acetylneuraminic acid)**

***b* MVSHHN184LTTGATLINE = MVS, NLFLN207HSE = NLF, and VVLHPN241YSQVDIGLIK=VVL**

***c* Iso = Isomer**

**Supplementary Table S2.** Continue…

| **Structure *a, b ,c*** | **NASH64** | **NASH65** | **NASH66** | **NASH68** | **NASH69** |
| --- | --- | --- | --- | --- | --- |
| MVS_4500_Iso 1 | 0.032821 | 0.018495 | 0.093207 | 0.102637 | 0.079654 |
| MVS_4500_Iso 2 | 0.004885 | 0.005861 | 0.035778 | 0.037061 | 0.031314 |
| MVS_4511 | 0.035971 | 0.030515 | 0.081405 | 0.049904 | 0.007312 |
| MVS_4512 | 0.139956 | 0.140897 | 0.110254 | 0.147547 | 0.202808 |
| MVS_4501 | 0.991005 | 3.076426 | 4.859762 | 5.885275 | 3.729833 |
| MVS_4502 | 7.525659 | 10.926630 | 10.135561 | 13.273312 | 15.099920 |
| MVS_4601 | 0.012395 | 0.008348 | 0.043742 | 0.047696 | 0.055725 |
| MVS_5611 | 0.001519 | 0.009087 | 0.009697 | 0.017031 | 0.016102 |
| MVS_5612 | 0.023586 | 0.033364 | 0.011526 | 0.021668 | 0.016192 |
| MVS_5613 | 0.065833 | 0.057102 | 0.017286 | 0.019571 | 0.014876 |
| MVS_5601 | 0.049690 | 0.046124 | 0.233489 | 0.148610 | 0.122905 |
| MVS_5602_Iso 1 | 0.048518 | 0.164094 | 0.265955 | 0.230092 | 0.410897 |
| MVS_5602_Iso 2 | 0.098511 | 0.047375 | 0.135256 | 0.159002 | 0.111477 |
| NLF_3401_Iso 1 | 0.013364 | 0.015217 | 0.028078 | 0.033967 | 0.019442 |
| NLF_3401_Iso 2 | 0.071436 | 0.093098 | 0.309684 | 0.121783 | 0.177556 |
| NLF_4401_Iso1 | 0.016400 | 0.036666 | 0.049446 | 0.045021 | 0.020069 |
| NLF_4401_ Iso 2 | 0.018597 | 0.030315 | 0.021561 | 0.021133 | 0.014436 |
| NLF_4401_ Iso 3 | 0.010283 | 0.012093 | 0.006538 | 0.006410 | 0.010165 |
| NLF_4500_ Iso 1 | 0.356009 | 0.222757 | 0.570030 | 0.728540 | 0.391688 |
| NLF_4500_ Iso 2 | 0.105699 | 0.089131 | 0.187503 | 0.214142 | 0.083942 |
| NLF_4511_ Iso 1 | 0.573219 | 1.230297 | 0.239408 | 0.363680 | 0.117727 |
| NLF_4511_ Iso 2 | 0.242799 | 0.410780 | 0.134127 | 0.314982 | 0.094595 |
| NLF_4512_ Iso 1 | 0.148542 | 0.122822 | 0.185846 | 0.124501 | 0.246391 |
| NLF_4512_ Iso 2 | 0.961525 | 0.703215 | 0.163873 | 0.560256 | 0.316534 |
| NLF_4501 | 8.482610 | 9.496483 | 16.684709 | 17.782035 | 14.341483 |
| NLF_4502_ Iso 1 | 34.094602 | 17.411728 | 23.908732 | 27.291433 | 28.650638 |
| NLF_4502_ Iso 2 | 8.162103 | 4.160802 | 5.077647 | 6.978165 | 8.771626 |
| NLF_5611_ Iso 1 | 0.365522 | 0.619405 | 0.327207 | 0.121081 | 0.103204 |
| NLF_5611_ Iso 2 | 0.166389 | 0.115282 | 0.059698 | 0.061321 | 0.031979 |
| NLF_5612_ Iso 1 | 0.365029 | 0.452259 | 0.228691 | 0.115449 | 0.068060 |
| NLF_5612_ Iso 2 | 2.172151 | 2.840466 | 0.773926 | 1.058662 | 0.642242 |
| NLF_5613_ Iso 1 | 4.408092 | 3.817594 | 1.077815 | 1.725092 | 1.165270 |
| NLF_5613_ Iso 2 | 1.046342 | 0.426597 | 0.179104 | 0.395102 | 0.256140 |
| NLF_5601_ Iso 1 | 2.519740 | 1.021250 | 2.181248 | 0.551326 | 2.275350 |
| NLF_5601_ Iso 2 | 1.426419 | 2.054766 | 3.969624 | 2.474537 | 0.255198 |
| NLF_5602_ Iso 1 | 1.998466 | 2.074053 | 5.057816 | 2.331632 | 2.058916 |
| NLF_5602_ Iso 2 | 6.197276 | 4.350360 | 5.856530 | 4.679456 | 5.169176 |
| NLF_5603_ Iso 1 | 1.917487 | 0.867126 | 2.253902 | 1.312592 | 1.665800 |
| NLF_5603_ Iso 2 | 6.985136 | 2.900953 | 5.482028 | 4.381463 | 6.299867 |
| NLF_5603_ Iso 3 | 1.919575 | 0.543638 | 0.989102 | 0.860841 | 1.779815 |
| NLF_6711_ Iso 1 | 0.166699 | 0.115538 | 0.440441 | 0.554227 | 0.180072 |
| NLF_6711_ Iso 2 | 0.192423 | 0.168089 | 0.293764 | 0.176573 | 0.081263 |
| NLF_6711_ Iso 3 | 0.022068 | 0.070855 | 0.015756 | 0.015631 | 0.013493 |
| NLF_6711_ Iso 4 | 0.018525 | 0.046552 | 0.017812 | 0.017891 | 0.020083 |
| NLF_6712_ Iso 1 | 0.343872 | 0.273244 | 0.103875 | 0.028629 | 0.047682 |
| NLF_6712_ Iso 2 | 0.046206 | 0.034592 | 0.031754 | 0.041685 | 0.010380 |
| NLF_6712_ Iso 3 | 0.039680 | 0.047405 | 0.048923 | 0.027094 | 0.038565 |
| NLF_6713_ Iso 1 | 0.015159 | 0.003617 | 0.007473 | 0.002941 | 0.039895 |
| NLF_6713_ Iso 2 | 0.003921 | 0.028882 | 0.031975 | 0.026506 | 0.009590 |
| NLF_6713_ Iso 3 | 0.009110 | 0.011126 | 0.009535 | 0.009378 | 0.007165 |
| NLF_6713_ Iso 4 | 0.015119 | 0.035662 | 0.020021 | 0.026491 | 0.016575 |
| NLF_6713_ Iso 5 | 0.141527 | 0.069412 | 0.021380 | 0.014894 | 0.020355 |
| NLF_6701 | 0.917457 | 0.579255 | 1.842783 | 0.300828 | 0.418949 |
| NLF_6702_ Iso 1 | 0.314416 | 0.157314 | 0.398727 | 0.064262 | 0.085498 |
| NLF_6702_ Iso 2 | 1.203364 | 0.391674 | 0.760361 | 0.159645 | 0.182924 |
| NLF_6702_ Iso 3 | 0.270532 | 0.119945 | 0.181644 | 0.156143 | 0.493408 |
| NLF_6704 | 0.025749 | 0.168894 | 0.034133 | 0.028233 | 0.028588 |
| VVL_4401 | 0.053860 | 0.065571 | 0.056801 | 0.026087 | 0.051323 |
| VVL_4500 | 0.001386 | 0.002448 | 0.004485 | 0.001021 | 0.001237 |
| VVL_4512_ Iso 1 | 0.021783 | 0.056252 | 0.017363 | 0.013925 | 0.021012 |
| VVL_4512_ Iso 2 | 0.074695 | 0.264472 | 0.058705 | 0.092511 | 0.105185 |
| VVL_4501 | 0.166428 | 1.784726 | 0.249506 | 0.176554 | 0.229211 |
| VVL_4502 | 1.508094 | 21.735743 | 2.243508 | 2.568412 | 2.454379 |
| VVL_5612 | 0.224632 | 0.267231 | 0.214506 | 0.202991 | 0.120219 |
| VVL_5601 | 0.004964 | 0.127564 | 0.442685 | 0.144339 | 0.054364 |
| VVL_5602 | 0.077847 | 0.914795 | 0.088777 | 0.050178 | 0.040046 |
| VVL_5603_ Iso 1 | 0.022994 | 0.227440 | 0.020920 | 0.014826 | 0.012348 |
| VVL_5603_ Iso 2 | 0.075308 | 0.943738 | 0.064805 | 0.056978 | 0.044529 |
| VVL_5603_ Iso 3 | 0.050225 | 0.261981 | 0.019067 | 0.015032 | 0.020181 |
| VVL_6701 | 0.017763 | 0.044870 | 0.031257 | 0.029686 | 0.021365 |
| VVL_6702 | 0.060828 | 0.117848 | 0.080214 | 0.042618 | 0.048060 |
| VVL_6703_ Iso 1 | 0.017256 | 0.033517 | 0.031987 | 0.030519 | 0.016366 |
| VVL_6703_ Iso 2 | 0.100950 | 0.146277 | 0.078268 | 0.089262 | 0.139367 |

***a* PEPTIDE_HexNAc, Hex, Fuc, NeuAc (*N-*acetylhexosamine, Hexose, Fucose, N-acetylneuraminic acid)**

***b* MVSHHN184LTTGATLINE = MVS, NLFLN207HSE = NLF, and VVLHPN241YSQVDIGLIK=VVL**

***c* Iso = Isomer**

**Supplementary Table S2.** Continue…

| **Structure *a, b ,c*** | **NASH70** | **NASH71** | **NASH73** | **NASH74** | **NASH75** |
| --- | --- | --- | --- | --- | --- |
| MVS_4500_Iso 1 | 0.025288 | 0.031289 | 0.030699 | 0.005283 | 0.041948 |
| MVS_4500_Iso 2 | 0.008691 | 0.017123 | 0.012583 | 0.000616 | 0.020943 |
| MVS_4511 | 0.013780 | 0.026528 | 0.047044 | 0.014455 | 0.056449 |
| MVS_4512 | 0.168507 | 0.232839 | 0.305026 | 0.071861 | 0.128475 |
| MVS_4501 | 3.868416 | 6.346802 | 5.494557 | 2.679291 | 2.997591 |
| MVS_4502 | 16.143250 | 13.551931 | 19.738624 | 10.518908 | 7.218632 |
| MVS_4601 | 0.009236 | 0.030241 | 0.030248 | 0.001031 | 0.030000 |
| MVS_5611 | 0.008458 | 0.012889 | 0.004168 | 0.004238 | 0.014529 |
| MVS_5612 | 0.008898 | 0.003985 | 0.005968 | 0.003182 | 0.019761 |
| MVS_5613 | 0.018759 | 0.021682 | 0.075547 | 0.009440 | 0.023860 |
| MVS_5601 | 0.054381 | 0.083264 | 0.101279 | 0.019424 | 0.144204 |
| MVS_5602_Iso 1 | 0.255825 | 0.181519 | 0.213219 | 0.135891 | 0.255493 |
| MVS_5602_Iso 2 | 0.083919 | 0.243543 | 0.140239 | 0.040548 | 0.084061 |
| NLF_3401_Iso 1 | 0.017054 | 0.017097 | 0.017855 | 0.002419 | 0.027416 |
| NLF_3401_Iso 2 | 0.625158 | 0.119094 | 0.134859 | 0.096745 | 0.279583 |
| NLF_4401_Iso1 | 0.050602 | 0.041511 | 0.044439 | 0.005566 | 0.041995 |
| NLF_4401_ Iso 2 | 0.041036 | 0.018246 | 0.016774 | 0.006614 | 0.026720 |
| NLF_4401_ Iso 3 | 0.010048 | 0.008181 | 0.008887 | 0.001145 | 0.011571 |
| NLF_4500_ Iso 1 | 0.255294 | 0.503658 | 0.544607 | 0.033194 | 0.673523 |
| NLF_4500_ Iso 2 | 0.097555 | 0.081742 | 0.103402 | 0.035760 | 0.203847 |
| NLF_4511_ Iso 1 | 0.514451 | 0.183145 | 0.327927 | 0.972501 | 0.523523 |
| NLF_4511_ Iso 2 | 0.239246 | 0.104862 | 0.122916 | 0.219196 | 0.149793 |
| NLF_4512_ Iso 1 | 0.194058 | 0.213441 | 0.251160 | 0.112902 | 0.272582 |
| NLF_4512_ Iso 2 | 0.254111 | 0.213794 | 0.388888 | 0.427183 | 0.362392 |
| NLF_4501 | 10.300631 | 15.667643 | 15.142805 | 5.031428 | 17.168832 |
| NLF_4502_ Iso 1 | 23.793324 | 17.912863 | 17.365959 | 15.974436 | 27.254359 |
| NLF_4502_ Iso 2 | 5.526376 | 6.825881 | 5.338917 | 2.121642 | 5.961459 |
| NLF_5611_ Iso 1 | 0.186524 | 0.032414 | 0.128570 | 0.313674 | 0.251564 |
| NLF_5611_ Iso 2 | 0.047785 | 0.022487 | 0.040866 | 0.027136 | 0.071632 |
| NLF_5612_ Iso 1 | 0.149790 | 0.048109 | 0.093986 | 0.678996 | 0.230393 |
| NLF_5612_ Iso 2 | 0.801125 | 0.921126 | 1.120547 | 1.376349 | 1.242736 |
| NLF_5613_ Iso 1 | 0.870647 | 1.792720 | 2.493336 | 1.430335 | 1.887489 |
| NLF_5613_ Iso 2 | 0.111066 | 0.294654 | 0.381135 | 0.117582 | 0.259639 |
| NLF_5601_ Iso 1 | 0.903164 | 0.633730 | 0.884684 | 0.285978 | 0.489341 |
| NLF_5601_ Iso 2 | 3.659863 | 1.372880 | 1.364075 | 0.804597 | 2.986916 |
| NLF_5602_ Iso 1 | 3.110634 | 2.458154 | 2.158218 | 1.299460 | 3.627947 |
| NLF_5602_ Iso 2 | 5.132080 | 7.398976 | 4.780923 | 1.982730 | 7.454632 |
| NLF_5603_ Iso 1 | 1.064036 | 1.743831 | 1.796740 | 0.533894 | 2.379103 |
| NLF_5603_ Iso 2 | 4.219907 | 9.740465 | 6.443885 | 0.786852 | 7.877942 |
| NLF_5603_ Iso 3 | 0.606301 | 2.749123 | 1.490617 | 0.101589 | 1.611179 |
| NLF_6711_ Iso 1 | 0.073834 | 0.444999 | 0.330519 | 0.004636 | 0.083096 |
| NLF_6711_ Iso 2 | 0.036441 | 0.088209 | 0.123313 | 0.101536 | 0.541335 |
| NLF_6711_ Iso 3 | 0.066781 | 0.039566 | 0.040267 | 0.073671 | 0.366376 |
| NLF_6711_ Iso 4 | 0.049046 | 0.023139 | 0.015146 | 0.001879 | 0.105003 |
| NLF_6712_ Iso 1 | 0.049754 | 0.031955 | 0.073596 | 0.038584 | 0.129914 |
| NLF_6712_ Iso 2 | 0.014447 | 0.013273 | 0.026355 | 0.077451 | 0.032874 |
| NLF_6712_ Iso 3 | 0.023095 | 0.039439 | 0.032239 | 0.017789 | 0.055406 |
| NLF_6713_ Iso 1 | 0.005252 | 0.015206 | 0.016051 | 0.001141 | 0.006810 |
| NLF_6713_ Iso 2 | 0.052910 | 0.012985 | 0.015855 | 0.001047 | 0.045110 |
| NLF_6713_ Iso 3 | 0.010788 | 0.013489 | 0.009025 | 0.004359 | 0.025340 |
| NLF_6713_ Iso 4 | 0.030869 | 0.018019 | 0.013506 | 0.001909 | 0.033621 |
| NLF_6713_ Iso 5 | 0.010423 | 0.023247 | 0.044023 | 0.009605 | 0.042268 |
| NLF_6701 | 0.583437 | 0.417331 | 0.609933 | 0.255251 | 0.995393 |
| NLF_6702_ Iso 1 | 0.116651 | 0.085376 | 0.124680 | 0.083707 | 0.211377 |
| NLF_6702_ Iso 2 | 0.290977 | 0.377916 | 0.338921 | 0.078722 | 0.232455 |
| NLF_6702_ Iso 3 | 0.074313 | 0.148492 | 0.127318 | 0.014585 | 0.280028 |
| NLF_6704 | 0.016783 | 0.015041 | 0.008577 | 0.001167 | 0.022318 |
| VVL_4401 | 0.010919 | 0.015987 | 0.019180 | 0.125919 | 0.050822 |
| VVL_4500 | 0.004228 | 0.001400 | 0.002235 | 0.002930 | 0.001048 |
| VVL_4512_ Iso 1 | 0.010630 | 0.015975 | 0.013397 | 0.034090 | 0.023458 |
| VVL_4512_ Iso 2 | 0.106510 | 0.177335 | 0.133335 | 0.140143 | 0.083488 |
| VVL_4501 | 1.157294 | 0.335307 | 0.464115 | 2.537145 | 0.135101 |
| VVL_4502 | 12.466336 | 4.558397 | 7.390271 | 47.004489 | 1.478866 |
| VVL_5612 | 0.245884 | 0.174957 | 0.152589 | 0.097631 | 0.239136 |
| VVL_5601 | 0.066572 | 0.504554 | 0.241086 | 0.264937 | 0.122102 |
| VVL_5602 | 0.326243 | 0.032022 | 0.056378 | 0.183984 | 0.028333 |
| VVL_5603_ Iso 1 | 0.083151 | 0.008826 | 0.011763 | 0.096858 | 0.011685 |
| VVL_5603_ Iso 2 | 0.289504 | 0.142000 | 0.149144 | 0.196164 | 0.046975 |
| VVL_5603_ Iso 3 | 0.085543 | 0.037163 | 0.038376 | 0.017428 | 0.015510 |
| VVL_6701 | 0.030595 | 0.019777 | 0.016041 | 0.018129 | 0.021011 |
| VVL_6702 | 0.036281 | 0.024191 | 0.030800 | 0.029572 | 0.083621 |
| VVL_6703_ Iso 1 | 0.051813 | 0.061209 | 0.069182 | 0.096759 | 0.019276 |
| VVL_6703_ Iso 2 | 0.073418 | 0.179755 | 0.076605 | 0.102710 | 0.066791 |

***a* PEPTIDE_HexNAc, Hex, Fuc, NeuAc (*N-*acetylhexosamine, Hexose, Fucose, N-acetylneuraminic acid)**

***b* MVSHHN184LTTGATLINE = MVS, NLFLN207HSE = NLF, and VVLHPN241YSQVDIGLIK=VVL**

***c* Iso = Isomer**

**Supplementary Table S3.** Normalized abundance of all identified haptoglobin *N-*glycopeptides from hepatocellular carcinoma (HCC) patients.

| **Structure *a, b ,c*** | **NASH80** | **NASH81** | **NASH82** | **NASH83** | **NASH84** |
| --- | --- | --- | --- | --- | --- |
| MVS_4500_Iso 1 | 0.018390 | 0.042167 | 0.009959 | 0.048447 | 0.001359 |
| MVS_4500_Iso 2 | 0.005339 | 0.008975 | 0.001073 | 0.013685 | 0.000241 |
| MVS_4511 | 0.064136 | 0.120781 | 0.319728 | 0.058731 | 0.002278 |
| MVS_4512 | 0.536772 | 0.407431 | 1.352730 | 0.212077 | 0.042740 |
| MVS_4501 | 2.758974 | 5.540143 | 1.767233 | 5.610800 | 1.683306 |
| MVS_4502 | 19.612259 | 23.748838 | 20.966204 | 11.754648 | 5.350669 |
| MVS_4601 | 0.034823 | 0.040624 | 0.022373 | 0.016893 | 0.001671 |
| MVS_5611 | 0.013249 | 0.016960 | 0.042162 | 0.008494 | 0.002621 |
| MVS_5612 | 0.040773 | 0.064593 | 0.192926 | 0.121585 | 0.001621 |
| MVS_5613 | 0.424713 | 0.242499 | 0.571155 | 0.059004 | 0.014277 |
| MVS_5601 | 0.066057 | 0.130397 | 0.063240 | 0.258955 | 0.005261 |
| MVS_5602_Iso 1 | 0.246908 | 0.482251 | 0.054078 | 0.344086 | 0.047159 |
| MVS_5602_Iso 2 | 0.129440 | 0.061959 | 0.056445 | 0.209636 | 0.004092 |
| NLF_3401_Iso 1 | 0.019263 | 0.010353 | 0.023690 | 3.046565 | 0.009569 |
| NLF_3401_Iso 2 | 0.148738 | 0.267424 | 0.073815 | 0.547623 | 0.095834 |
| NLF_4401_Iso1 | 0.024271 | 0.022568 | 0.009046 | 0.091742 | 0.024262 |
| NLF_4401_ Iso 2 | 0.013601 | 0.004256 | 0.008803 | 0.011198 | 0.021117 |
| NLF_4401_ Iso 3 | 0.012774 | 0.006147 | 0.009415 | 0.017697 | 0.007734 |
| NLF_4500_ Iso 1 | 0.343577 | 0.201034 | 0.126338 | 0.315145 | 0.069585 |
| NLF_4500_ Iso 2 | 0.076057 | 0.062490 | 0.033050 | 0.082315 | 0.051137 |
| NLF_4511_ Iso 1 | 0.799717 | 0.868330 | 4.781089 | 0.258328 | 0.567100 |
| NLF_4511_ Iso 2 | 0.138139 | 0.264948 | 0.529080 | 0.133392 | 0.603086 |
| NLF_4512_ Iso 1 | 0.320630 | 0.185947 | 0.314777 | 0.209892 | 0.262542 |
| NLF_4512_ Iso 2 | 0.612481 | 0.656899 | 2.568028 | 0.611171 | 1.821667 |
| NLF_4501 | 12.108439 | 8.474201 | 5.063297 | 11.503339 | 10.977001 |
| NLF_4502_ Iso 1 | 21.178823 | 19.820294 | 19.502607 | 17.643047 | 20.457046 |
| NLF_4502_ Iso 2 | 3.332840 | 3.964842 | 1.963760 | 3.776033 | 7.446380 |
| NLF_5611_ Iso 1 | 0.803614 | 0.350440 | 1.488573 | 0.190177 | 0.125385 |
| NLF_5611_ Iso 2 | 0.094330 | 0.054350 | 0.105931 | 0.032590 | 0.051328 |
| NLF_5612_ Iso 1 | 0.511010 | 0.383790 | 0.877575 | 0.120682 | 0.266668 |
| NLF_5612_ Iso 2 | 2.943443 | 2.309914 | 4.152361 | 1.348860 | 2.826986 |
| NLF_5613_ Iso 1 | 6.405748 | 4.314636 | 5.867232 | 2.411643 | 3.541430 |
| NLF_5613_ Iso 2 | 0.455499 | 0.478325 | 0.371390 | 0.409703 | 0.836279 |
| NLF_5601_ Iso 1 | 1.302624 | 0.794187 | 2.425652 | 0.627128 | 0.209426 |
| NLF_5601_ Iso 2 | 1.041017 | 1.335001 | 0.237146 | 1.451610 | 0.435425 |
| NLF_5602_ Iso 1 | 2.372311 | 2.204070 | 0.700423 | 2.414971 | 1.094525 |
| NLF_5602_ Iso 2 | 3.037543 | 3.236357 | 1.076106 | 5.916466 | 3.081163 |
| NLF_5603_ Iso 1 | 2.401162 | 1.772805 | 0.841982 | 1.996949 | 0.814591 |
| NLF_5603_ Iso 2 | 3.175866 | 3.179591 | 0.092827 | 6.762970 | 1.803736 |
| NLF_5603_ Iso 3 | 0.422811 | 0.702123 | 0.051893 | 2.062104 | 0.684886 |
| NLF_6711_ Iso 1 | 0.160627 | 0.106878 | 0.079148 | 0.831353 | 0.201913 |
| NLF_6711_ Iso 2 | 0.430416 | 0.189504 | 0.994404 | 0.439459 | 0.080461 |
| NLF_6711_ Iso 3 | 0.005656 | 0.003324 | 0.001466 | 0.006095 | 0.006605 |
| NLF_6711_ Iso 4 | 0.011304 | 0.002823 | 0.002778 | 0.011450 | 0.014024 |
| NLF_6712_ Iso 1 | 0.351978 | 0.174162 | 1.000778 | 0.282690 | 0.062221 |
| NLF_6712_ Iso 2 | 0.050998 | 0.026353 | 0.062790 | 0.097507 | 0.013939 |
| NLF_6712_ Iso 3 | 0.057098 | 0.042570 | 0.043547 | 0.069299 | 0.022671 |
| NLF_6713_ Iso 1 | 0.014795 | 0.004805 | 0.007578 | 0.008606 | 0.001024 |
| NLF_6713_ Iso 2 | 0.010068 | 0.010702 | 0.014107 | 0.017384 | 0.008072 |
| NLF_6713_ Iso 3 | 0.006506 | 0.004118 | 0.032579 | 0.018605 | 0.002410 |
| NLF_6713_ Iso 4 | 0.016670 | 0.010354 | 0.012427 | 0.018109 | 0.024577 |
| NLF_6713_ Iso 5 | 0.081528 | 0.039228 | 0.108700 | 0.181265 | 0.022766 |
| NLF_6701 | 1.121369 | 0.536610 | 0.355589 | 3.131074 | 0.104906 |
| NLF_6702_ Iso 1 | 0.260423 | 0.143371 | 0.187311 | 0.824098 | 0.043944 |
| NLF_6702_ Iso 2 | 0.387301 | 0.295634 | 0.080885 | 1.999365 | 0.097955 |
| NLF_6702_ Iso 3 | 0.229344 | 0.111064 | 0.020546 | 0.992589 | 0.051185 |
| NLF_6704 | 0.019695 | 0.003087 | 0.058094 | 0.070857 | 0.007241 |
| VVL_4401 | 0.017001 | 0.011102 | 0.010161 | 0.075506 | 0.015739 |
| VVL_4500 | 0.001049 | 0.000641 | 0.001604 | 0.001029 | 0.000453 |
| VVL_4512_ Iso 1 | 0.034105 | 0.016548 | 0.038051 | 0.033835 | 0.060672 |
| VVL_4512_ Iso 2 | 0.151424 | 0.104758 | 0.492608 | 0.207442 | 0.249664 |
| VVL_4501 | 0.477923 | 0.603691 | 0.779235 | 0.330266 | 1.273670 |
| VVL_4502 | 7.245465 | 9.945541 | 14.532356 | 5.776943 | 30.245276 |
| VVL_5612 | 0.192601 | 0.012433 | 0.766378 | 0.397937 | 0.772138 |
| VVL_5601 | 0.149205 | 0.084772 | 0.197126 | 0.082012 | 0.030689 |
| VVL_5602 | 0.076387 | 0.140355 | 0.434349 | 0.179061 | 0.158114 |
| VVL_5603_ Iso 1 | 0.030469 | 0.066948 | 0.167023 | 0.083968 | 0.139704 |
| VVL_5603_ Iso 2 | 0.137759 | 0.291788 | 0.590721 | 0.367428 | 0.443306 |
| VVL_5603_ Iso 3 | 0.032786 | 0.055973 | 0.107101 | 0.170589 | 0.085605 |
| VVL_6701 | 0.016645 | 0.013592 | 0.010492 | 0.031089 | 0.015972 |
| VVL_6702 | 0.041166 | 0.018354 | 0.014181 | 0.142419 | 0.015752 |
| VVL_6703_ Iso 1 | 0.038016 | 0.038963 | 0.036106 | 0.158873 | 0.107396 |
| VVL_6703_ Iso 2 | 0.094064 | 0.057012 | 0.044587 | 0.251416 | 0.276759 |

***a* PEPTIDE_HexNAc, Hex, Fuc, NeuAc (*N-*acetylhexosamine, Hexose, Fucose, N-acetylneuraminic acid)**

***b* MVSHHN184LTTGATLINE = MVS, NLFLN207HSE = NLF, and VVLHPN241YSQVDIGLIK=VVL**

***c* Iso = Isomer**

**Supplementary Table S3.** Continue…

| **Structure *a, b ,c*** | **NASH85** | **NASH86** | **NASH87** | **NASH88** | **NASH89** |
| --- | --- | --- | --- | --- | --- |
| MVS_4500_Iso 1 | 0.013903 | 0.007887 | 0.065351 | 0.017733 | 0.003359 |
| MVS_4500_Iso 2 | 0.005633 | 0.001347 | 0.009340 | 0.008711 | 0.000717 |
| MVS_4511 | 0.101863 | 0.029141 | 0.093585 | 0.001427 | 0.029004 |
| MVS_4512 | 0.166161 | 0.195510 | 0.250899 | 0.101334 | 0.173745 |
| MVS_4501 | 0.963854 | 1.171196 | 5.224654 | 2.689460 | 3.429267 |
| MVS_4502 | 6.635813 | 16.007594 | 17.041667 | 14.606906 | 15.621921 |
| MVS_4601 | 0.023981 | 0.013759 | 0.032803 | 0.002180 | 0.002363 |
| MVS_5611 | 0.026474 | 0.003017 | 0.024894 | 0.000547 | 0.006896 |
| MVS_5612 | 0.076724 | 0.011872 | 0.056200 | 0.001147 | 0.011081 |
| MVS_5613 | 0.017651 | 0.145091 | 0.252802 | 0.027110 | 0.108604 |
| MVS_5601 | 0.069172 | 0.016015 | 0.080073 | 0.028611 | 0.054110 |
| MVS_5602_Iso 1 | 0.102591 | 0.126042 | 0.431521 | 0.248227 | 0.286881 |
| MVS_5602_Iso 2 | 0.079245 | 0.011364 | 0.040911 | 0.076130 | 0.011995 |
| NLF_3401_Iso 1 | 0.060403 | 0.006497 | 0.015498 | 0.012043 | 0.004608 |
| NLF_3401_Iso 2 | 0.249684 | 0.067965 | 0.548739 | 0.123114 | 0.113515 |
| NLF_4401_Iso1 | 0.033755 | 0.014865 | 0.004047 | 0.014854 | 0.022808 |
| NLF_4401_ Iso 2 | 0.027338 | 0.025860 | 0.050756 | 0.023365 | 0.020022 |
| NLF_4401_ Iso 3 | 0.032038 | 0.010624 | 0.049758 | 0.007369 | 0.013157 |
| NLF_4500_ Iso 1 | 0.311237 | 0.199427 | 0.484579 | 0.153321 | 0.059282 |
| NLF_4500_ Iso 2 | 0.115243 | 0.039336 | 0.080055 | 0.046505 | 0.024142 |
| NLF_4511_ Iso 1 | 1.781908 | 0.546768 | 0.679283 | 0.146017 | 0.671950 |
| NLF_4511_ Iso 2 | 0.331865 | 0.325383 | 0.307140 | 0.133157 | 0.475695 |
| NLF_4512_ Iso 1 | 0.194708 | 0.142618 | 0.225373 | 0.112917 | 0.125608 |
| NLF_4512_ Iso 2 | 1.165697 | 14.116570 | 0.808185 | 0.311736 | 1.613411 |
| NLF_4501 | 9.943671 | 8.313618 | 14.817906 | 9.538032 | 10.488934 |
| NLF_4502_ Iso 1 | 32.679877 | 18.455235 | 17.661995 | 15.297524 | 20.037550 |
| NLF_4502_ Iso 2 | 3.878091 | 4.875535 | 5.594622 | 3.799423 | 5.648563 |
| NLF_5611_ Iso 1 | 1.564692 | 0.203879 | 0.279537 | 0.050844 | 0.400126 |
| NLF_5611_ Iso 2 | 0.244079 | 0.071505 | 0.069242 | 0.024828 | 0.064014 |
| NLF_5612_ Iso 1 | 1.517052 | 0.386010 | 0.279638 | 0.130480 | 0.402239 |
| NLF_5612_ Iso 2 | 4.589967 | 2.518837 | 2.713750 | 0.742381 | 3.178570 |
| NLF_5613_ Iso 1 | 7.729306 | 4.324915 | 5.717861 | 1.477272 | 4.087818 |
| NLF_5613_ Iso 2 | 0.952827 | 0.652131 | 0.807458 | 0.268254 | 0.973370 |
| NLF_5601_ Iso 1 | 2.118739 | 0.520630 | 1.629819 | 0.141867 | 0.828096 |
| NLF_5601_ Iso 2 | 1.529923 | 0.289261 | 0.384800 | 0.672433 | 0.932075 |
| NLF_5602_ Iso 1 | 2.722509 | 1.442714 | 2.382966 | 2.082525 | 1.770689 |
| NLF_5602_ Iso 2 | 2.798112 | 2.033910 | 3.719405 | 4.253283 | 4.822992 |
| NLF_5603_ Iso 1 | 3.254558 | 1.542136 | 2.843851 | 1.414574 | 0.903111 |
| NLF_5603_ Iso 2 | 2.474939 | 1.929622 | 2.889762 | 6.563167 | 3.342152 |
| NLF_5603_ Iso 3 | 0.454749 | 0.301493 | 0.912854 | 1.106726 | 1.118861 |
| NLF_6711_ Iso 1 | 0.212669 | 0.066692 | 0.302980 | 0.120470 | 0.251390 |
| NLF_6711_ Iso 2 | 1.286717 | 0.039974 | 0.047264 | 0.273058 | 0.032363 |
| NLF_6711_ Iso 3 | 0.025335 | 0.042487 | 0.010798 | 0.006279 | 0.030895 |
| NLF_6711_ Iso 4 | 0.022774 | 0.003360 | 0.026102 | 0.009981 | 0.003642 |
| NLF_6712_ Iso 1 | 0.932275 | 0.132961 | 0.136576 | 0.017517 | 0.273439 |
| NLF_6712_ Iso 2 | 0.053803 | 0.038614 | 0.048575 | 0.016808 | 0.078114 |
| NLF_6712_ Iso 3 | 0.053528 | 0.035270 | 0.082588 | 0.034473 | 0.044348 |
| NLF_6713_ Iso 1 | 0.034828 | 0.005344 | 0.015034 | 0.003527 | 0.002129 |
| NLF_6713_ Iso 2 | 0.013697 | 0.007599 | 0.016998 | 0.007447 | 0.006628 |
| NLF_6713_ Iso 3 | 0.019126 | 0.003770 | 0.021574 | 0.002431 | 0.003603 |
| NLF_6713_ Iso 4 | 0.033548 | 0.018934 | 0.048923 | 0.018049 | 0.020142 |
| NLF_6713_ Iso 5 | 0.203710 | 0.054203 | 0.065034 | 0.014262 | 0.147896 |
| NLF_6701 | 1.752645 | 0.227853 | 0.602450 | 0.222017 | 0.591533 |
| NLF_6702_ Iso 1 | 0.627830 | 0.067982 | 0.140568 | 0.031638 | 0.155080 |
| NLF_6702_ Iso 2 | 0.619374 | 0.119699 | 0.143554 | 0.156185 | 0.446378 |
| NLF_6702_ Iso 3 | 0.204713 | 0.114806 | 0.233686 | 0.070877 | 0.118473 |
| NLF_6704 | 0.037514 | 0.008994 | 0.025741 | 0.016143 | 0.019388 |
| VVL_4401 | 0.034047 | 0.006645 | 0.020027 | 0.023201 | 0.013919 |
| VVL_4500 | 0.000659 | 0.000411 | 0.000748 | 0.000262 | 0.003152 |
| VVL_4512_ Iso 1 | 0.044815 | 0.051404 | 0.033541 | 0.115080 | 0.009184 |
| VVL_4512_ Iso 2 | 0.076218 | 0.175084 | 0.120809 | 0.166294 | 0.188487 |
| VVL_4501 | 0.130917 | 0.977064 | 0.491682 | 1.485553 | 0.679089 |
| VVL_4502 | 1.595212 | 15.579601 | 7.056213 | 27.297044 | 13.073998 |
| VVL_5612 | 0.398405 | 0.240818 | 0.032751 | 0.095187 | 0.312520 |
| VVL_5601 | 0.155239 | 0.174458 | 0.104063 | 0.289531 | 0.542454 |
| VVL_5602 | 0.064706 | 0.127279 | 0.101613 | 1.323046 | 0.109783 |
| VVL_5603_ Iso 1 | 0.024990 | 0.097646 | 0.039110 | 0.234217 | 0.056833 |
| VVL_5603_ Iso 2 | 0.045615 | 0.244502 | 0.127304 | 1.007485 | 0.173329 |
| VVL_5603_ Iso 3 | 0.014172 | 0.033121 | 0.020600 | 0.053382 | 0.024285 |
| VVL_6701 | 0.026019 | 0.008427 | 0.027495 | 0.026856 | 0.043874 |
| VVL_6702 | 0.056861 | 0.011359 | 0.031112 | 0.036313 | 0.012120 |
| VVL_6703_ Iso 1 | 0.020905 | 0.056770 | 0.050902 | 0.184942 | 0.308083 |
| VVL_6703_ Iso 2 | 0.137099 | 0.129690 | 0.210009 | 0.182908 | 0.340148 |

***a* PEPTIDE_HexNAc, Hex, Fuc, NeuAc (*N-*acetylhexosamine, Hexose, Fucose, N-acetylneuraminic acid)**

***b* MVSHHN184LTTGATLINE = MVS, NLFLN207HSE = NLF, and VVLHPN241YSQVDIGLIK=VVL**

***c* Iso = Isomer**

**Supplementary Table S3.** Continue…

| **Structure *a, b ,c*** | **NASH91** | **NASH92** | **NASH94** | **NASH95** | **NASH96** |
| --- | --- | --- | --- | --- | --- |
| MVS_4500_Iso 1 | 0.005459 | 0.125431 | 0.039421 | 0.029557 | 0.033503 |
| MVS_4500_Iso 2 | 0.001146 | 0.079301 | 0.030373 | 0.014624 | 0.011815 |
| MVS_4511 | 0.030715 | 0.216037 | 0.487413 | 0.793313 | 0.008446 |
| MVS_4512 | 0.482810 | 0.386539 | 0.324834 | 0.408963 | 0.075421 |
| MVS_4501 | 1.690582 | 7.035792 | 3.485044 | 4.208997 | 3.764820 |
| MVS_4502 | 16.897645 | 18.812137 | 9.693371 | 15.602805 | 12.631237 |
| MVS_4601 | 0.007133 | 0.030091 | 0.041514 | 0.028633 | 0.014400 |
| MVS_5611 | 0.001158 | 0.023680 | 0.063192 | 0.065442 | 0.001659 |
| MVS_5612 | 0.011370 | 0.072438 | 0.078666 | 0.068346 | 0.002871 |
| MVS_5613 | 0.119243 | 0.378106 | 0.200616 | 0.168934 | 0.035843 |
| MVS_5601 | 0.019229 | 0.204848 | 0.150684 | 0.086871 | 0.043100 |
| MVS_5602_Iso 1 | 0.211819 | 0.657046 | 0.107409 | 0.092856 | 0.103462 |
| MVS_5602_Iso 2 | 0.039023 | 0.177353 | 0.106916 | 0.071394 | 0.083217 |
| NLF_3401_Iso 1 | 0.009558 | 0.027438 | 0.039541 | 0.012308 | 0.013474 |
| NLF_3401_Iso 2 | 0.379045 | 0.158237 | 0.159883 | 0.344972 | 0.098257 |
| NLF_4401_Iso1 | 0.097547 | 0.033008 | 0.040001 | 0.025046 | 0.034387 |
| NLF_4401_ Iso 2 | 0.007418 | 0.054718 | 0.017840 | 0.011396 | 0.014561 |
| NLF_4401_ Iso 3 | 0.019711 | 0.019362 | 0.018031 | 0.006381 | 0.008064 |
| NLF_4500_ Iso 1 | 0.205792 | 0.532440 | 0.409754 | 0.315604 | 0.506566 |
| NLF_4500_ Iso 2 | 0.054427 | 0.107191 | 0.120834 | 0.069050 | 0.136044 |
| NLF_4511_ Iso 1 | 0.472519 | 0.538411 | 2.921233 | 4.556688 | 0.345174 |
| NLF_4511_ Iso 2 | 0.212778 | 0.210587 | 0.844963 | 0.514041 | 0.163315 |
| NLF_4512_ Iso 1 | 0.209418 | 0.213253 | 0.266743 | 0.184344 | 0.083719 |
| NLF_4512_ Iso 2 | 0.766802 | 0.841419 | 1.744150 | 1.240237 | 0.446079 |
| NLF_4501 | 9.136717 | 11.587760 | 12.657660 | 11.652803 | 17.247084 |
| NLF_4502_ Iso 1 | 20.352635 | 14.230699 | 30.109634 | 18.308867 | 20.267390 |
| NLF_4502_ Iso 2 | 6.648447 | 5.205045 | 3.807501 | 2.434839 | 4.295863 |
| NLF_5611_ Iso 1 | 0.129385 | 0.202626 | 0.567574 | 1.720650 | 0.149513 |
| NLF_5611_ Iso 2 | 0.029644 | 0.057744 | 0.067534 | 0.185705 | 0.039687 |
| NLF_5612_ Iso 1 | 0.144143 | 0.232895 | 1.285528 | 1.040929 | 0.104629 |
| NLF_5612_ Iso 2 | 1.795157 | 2.964052 | 5.248681 | 2.762897 | 1.513780 |
| NLF_5613_ Iso 1 | 3.171039 | 6.437640 | 6.302049 | 2.816341 | 2.634808 |
| NLF_5613_ Iso 2 | 0.659519 | 1.063995 | 0.939401 | 0.180368 | 0.361095 |
| NLF_5601_ Iso 1 | 0.872818 | 0.208543 | 2.240702 | 1.484849 | 0.488096 |
| NLF_5601_ Iso 2 | 0.563957 | 0.602104 | 1.249738 | 1.096634 | 1.058040 |
| NLF_5602_ Iso 1 | 1.076068 | 1.570358 | 1.726801 | 0.854529 | 1.910598 |
| NLF_5602_ Iso 2 | 4.303170 | 2.814402 | 3.063214 | 1.143290 | 4.208755 |
| NLF_5603_ Iso 1 | 1.044193 | 1.942396 | 1.603418 | 0.705909 | 1.414709 |
| NLF_5603_ Iso 2 | 4.577590 | 2.845563 | 1.566704 | 0.296931 | 4.713233 |
| NLF_5603_ Iso 3 | 1.277112 | 0.511126 | 0.308593 | 0.059128 | 0.985767 |
| NLF_6711_ Iso 1 | 0.058292 | 0.310305 | 0.753479 | 1.118471 | 0.573061 |
| NLF_6711_ Iso 2 | 0.022997 | 0.077761 | 0.115151 | 0.118197 | 0.192030 |
| NLF_6711_ Iso 3 | 0.005648 | 0.019845 | 0.017204 | 0.006154 | 0.006022 |
| NLF_6711_ Iso 4 | 0.027496 | 0.026758 | 0.019709 | 0.003195 | 0.014184 |
| NLF_6712_ Iso 1 | 0.094474 | 0.172235 | 0.697534 | 0.403601 | 0.047425 |
| NLF_6712_ Iso 2 | 0.031677 | 0.081799 | 0.098233 | 0.047488 | 0.012902 |
| NLF_6712_ Iso 3 | 0.046502 | 0.068716 | 0.068057 | 0.056563 | 0.030101 |
| NLF_6713_ Iso 1 | 0.008776 | 0.831132 | 0.008390 | 0.000835 | 0.000606 |
| NLF_6713_ Iso 2 | 0.005794 | 0.012992 | 0.026166 | 0.022947 | 0.018264 |
| NLF_6713_ Iso 3 | 0.004830 | 0.018602 | 0.035744 | 0.004607 | 0.006233 |
| NLF_6713_ Iso 4 | 0.024707 | 0.034590 | 0.016216 | 0.031266 | 0.016791 |
| NLF_6713_ Iso 5 | 0.093868 | 0.142993 | 0.130518 | 0.043639 | 0.018196 |
| NLF_6701 | 0.355934 | 0.950833 | 1.102638 | 0.654562 | 0.325929 |
| NLF_6702_ Iso 1 | 0.104217 | 0.132114 | 0.278665 | 0.125050 | 0.059276 |
| NLF_6702_ Iso 2 | 0.574876 | 0.216031 | 0.401679 | 0.125115 | 0.162263 |
| NLF_6702_ Iso 3 | 0.165726 | 0.162058 | 0.135010 | 0.028758 | 0.077188 |
| NLF_6704 | 0.012139 | 0.028850 | 0.026147 | 0.018323 | 0.012334 |
| VVL_4401 | 0.016725 | 0.023080 | 0.024202 | 0.013343 | 0.017462 |
| VVL_4500 | 0.000677 | 0.000173 | 0.000210 | 0.004199 | 0.003201 |
| VVL_4512_ Iso 1 | 0.023504 | 0.457599 | 0.024637 | 0.120265 | 0.016660 |
| VVL_4512_ Iso 2 | 0.197721 | 0.391278 | 0.060369 | 0.248840 | 0.164325 |
| VVL_4501 | 0.966107 | 0.627639 | 0.130702 | 1.145258 | 0.981638 |
| VVL_4502 | 17.525157 | 9.678775 | 1.199180 | 17.907301 | 16.173779 |
| VVL_5612 | 0.182436 | 0.735455 | 0.188115 | 0.649393 | 0.321110 |
| VVL_5601 | 0.038826 | 0.293206 | 0.049258 | 0.759084 | 0.145438 |
| VVL_5602 | 0.186017 | 0.268140 | 0.037115 | 0.196404 | 0.083623 |
| VVL_5603_ Iso 1 | 0.077627 | 0.077559 | 0.012223 | 0.043071 | 0.020775 |
| VVL_5603_ Iso 2 | 0.699928 | 0.365003 | 0.020362 | 0.131925 | 0.211857 |
| VVL_5603_ Iso 3 | 0.371055 | 0.092160 | 0.008994 | 0.034433 | 0.049413 |
| VVL_6701 | 0.018975 | 0.049823 | 0.027919 | 0.041863 | 0.019058 |
| VVL_6702 | 0.029737 | 0.046426 | 0.033507 | 0.025620 | 0.027535 |
| VVL_6703_ Iso 1 | 0.133121 | 0.094480 | 0.012977 | 0.072264 | 0.057129 |
| VVL_6703_ Iso 2 | 0.160491 | 0.099784 | 0.102528 | 0.132499 | 0.081711 |

***a* PEPTIDE_HexNAc, Hex, Fuc, NeuAc (*N-*acetylhexosamine, Hexose, Fucose, N-acetylneuraminic acid)**

***b* MVSHHN184LTTGATLINE = MVS, NLFLN207HSE = NLF, and VVLHPN241YSQVDIGLIK=VVL**

***c* Iso = Isomer**

**Supplementary Table S4.** Descriptive statistics of biomarker candidates. MVSHHN184LTTGATLINE = MVS, NLFLN207HSE = NLF, VVLHPN241YSQVDIGLIK = VVL, Iso = isomer, and AFP = alpha-fetoprotein. Glycan nomenclature: HexNAc, Hex, Fuc, NeuAc (*N-*acetylhexosamine, Hexose, Fucose, *N-*acetylneuraminic acid).

| **Variable** | **Diagnosis** | **Sample number** | **Relative response (%)** | | ***p* - value** |
| --- | --- | --- | --- | --- | --- |
| **Mean** | **Standard deviation** |
| AFP | Cirrhosis | 15 | 3.30 | 1.34 | **0.001** |
| HCC | 15 | 7688.31 | 19821.80 |
| MVS_4512 | Cirrhosis | 15 | 0.16 | 0.10 | **0.030** |
| HCC | 15 | 0.34 | 0.32 |
| MVS_5613 | Cirrhosis | 15 | 0.06 | 0.08 | **0.016** |
| HCC | 15 | 0.18 | 0.17 |
| NLF_5612 Iso 2 | Cirrhosis | 15 | 1.48 | 0.77 | **0.001** |
| HCC | 15 | 2.77 | 1.21 |
| NLF_5613 Iso 1 | Cirrhosis | 15 | 2.24 | 1.23 | **0.001** |
| HCC | 15 | 4.48 | 1.84 |
| NLF_5613 Iso 2 | Cirrhosis | 15 | 0.34 | 0.24 | **0.004** |
| HCC | 15 | 0.63 | 0.29 |
| NLF_5601 Iso 2 | Cirrhosis | 15 | 1.95 | 1.38 | **0.026** |
| HCC | 15 | 0.86 | 0.43 |
| NLF_5602 Iso 2 | Cirrhosis | 15 | 4.89 | 1.87 | **0.011** |
| HCC | 15 | 3.30 | 1.31 |
| NLF_5603 Iso 2 | Cirrhosis | 15 | 4.88 | 2.59 | **0.037** |
| HCC | 15 | 3.08 | 1.95 |
| NLF_6711 Iso 4 | Cirrhosis | 15 | 0.03 | 0.03 | **0.033** |
| HCC | 15 | 0.01 | 0.01 |
| NLF_6712 Iso 1 | Cirrhosis | 15 | 0.32 | 0.31 | **0.037** |
| HCC | 15 | 0.13 | 0.11 |
| NLF_6712 Iso 3 | Cirrhosis | 15 | 0.04 | 0.02 | **0.033** |
| HCC | 15 | 0.05 | 0.02 |
| VVL_4401 | Cirrhosis | 15 | 0.04 | 0.03 | **0.006** |
| HCC | 15 | 0.02 | 0.02 |
| *Evaluation between cirrhosis and HCC TNM stage 1* | | | | | |
| MVS_5613 | Cirrhosis | 7 | 0.062 | 0.08 | **0.026** |
| HCC TNM 1 | 7 | 0.17 | 0.14 |
| NLF_5612 Iso 2 | Cirrhosis | 7 | 1.48 | 0.77 | **0.014** |
| HCC TNM 1 | 7 | 2.73 | 1.42 |
| NLF_5613 Iso 1 | Cirrhosis | 7 | 2.24 | 1.23 | **0.009** |
| HCC TNM 1 | 7 | 4.21 | 1.97 |
| NLF_6712 Iso 3 | Cirrhosis | 7 | 0.04 | 0.02 | **0.039** |
| HCC TNM 1 | 7 | 0.05 | 0.02 |
| VVL_4401 | Cirrhosis | 7 | 0.04 | 0.03 | **0.037** |
| HCC TNM 1 | 7 | 0.02 | 0.01 |

***p* – value (<0.05) obtained from Wilcoxon – Test.**

**Supplementary Table S5.** Pairwise Pearson’s correlation coefficient for the combination of two *N-*glycopeptides. MVSHHN184LTTGATLINE = MVS, NLFLN207HSE = NLF, VVLHPN241YSQVDIGLIK = VVL, Iso = isomer, and AFP = alpha-fetoprotein. Glycan nomenclature: HexNAc, Hex, Fuc, NeuAc (*N-*acetylhexosamine, Hexose, Fucose, *N-*acetylneuraminic acid).

| **Biomarker candidate 1** | **Biomarker candidate 2** | **Pearson’s correlation coefficient** | ***p*-value** |
| --- | --- | --- | --- |
| NLF_5602 Iso 2 | NLF_5603_2 | 0.92 | 6.91E-13 |
| NLF_5612 Iso 2 | NLF_5613_1 | 0.89 | 4.86E-11 |
| MVS_4512 | MVS_5613 | 0.84 | 7.29E-09 |
| NLF_5601 Iso 2 | NLF_5602_1 | 0.79 | 2.33E-07 |
| NLF_5613 Iso 1 | NLF_5613_2 | 0.77 | 6.38E-07 |
| NLF_4500 Iso 2 | NLF_5601_2 | 0.74 | 2.86E-06 |
| NLF_4500 Iso 2 | NLF_5602_1 | 0.73 | 4.37E-06 |
| NLF_5602 Iso 1 | NLF_5602_2 | 0.7 | 1.62E-05 |
| MVS_5613 | NLF_5613_1 | 0.66 | 6.68E-05 |
| NLF_5612 Iso 2 | NLF_5613_2 | 0.66 | 7.32E-05 |
| NLF_4500 Iso 2 | NLF_5602_2 | 0.6 | 0.0004 |
| NLF_5602 Iso 1 | NLF_5603_2 | 0.57 | 0.0009 |
| MVS_5613 | NLF_5612_2 | 0.56 | 0.0013 |
| NLF_5601 Iso 2 | NLF_5602_2 | 0.55 | 0.0017 |
